# Supplementary material
Source: PubMed Central journal article supplement (PMC3099707)

**FIG. S1**

**A.**

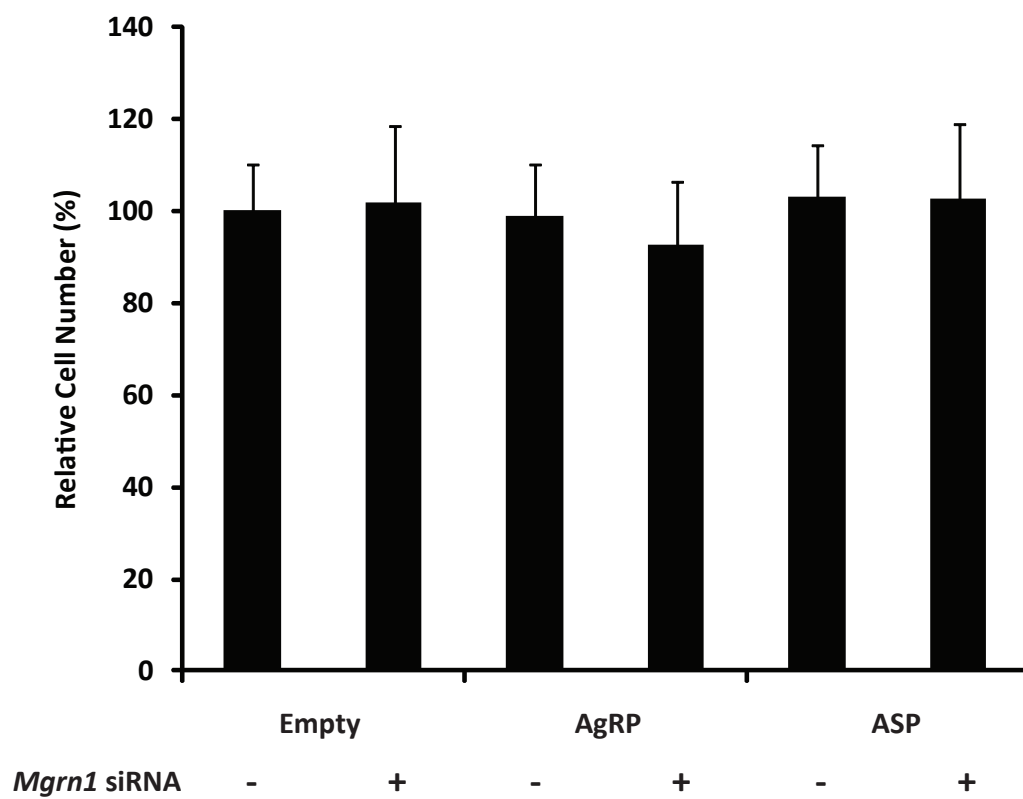

**B.**

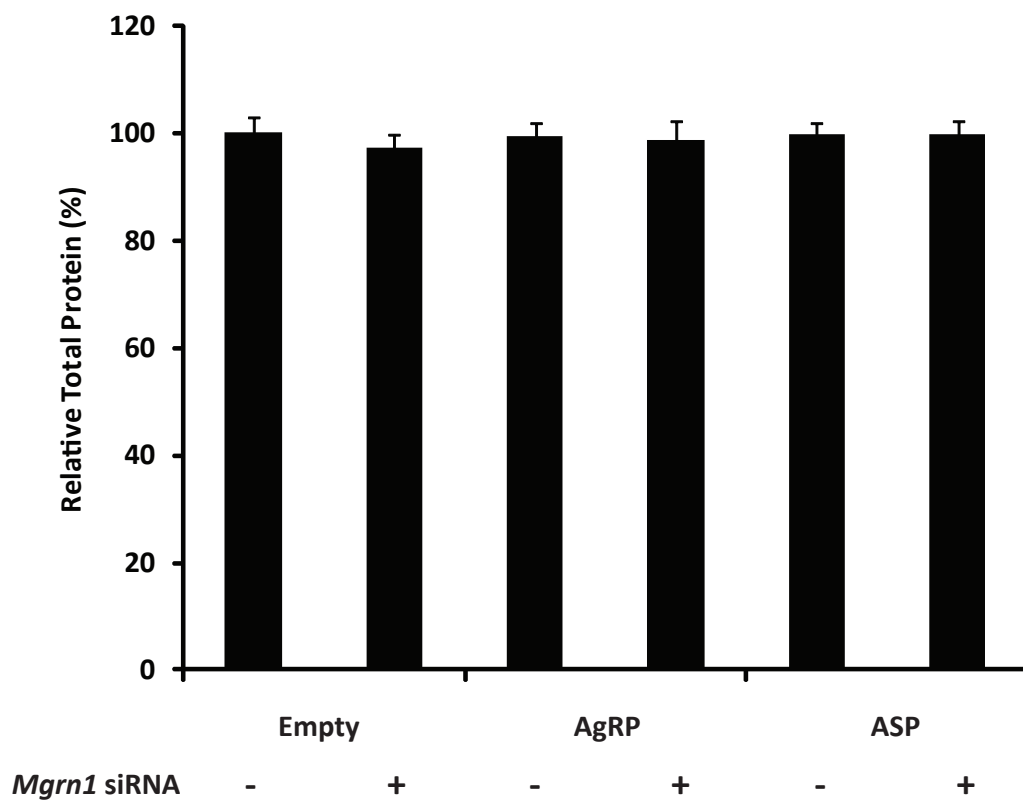

Supplement: supp_M111.224592_jbc.M111.224592-2.pdf [file supp_M111.224592_jbc.M111.224592-2.pdf]

**FIG. S2**

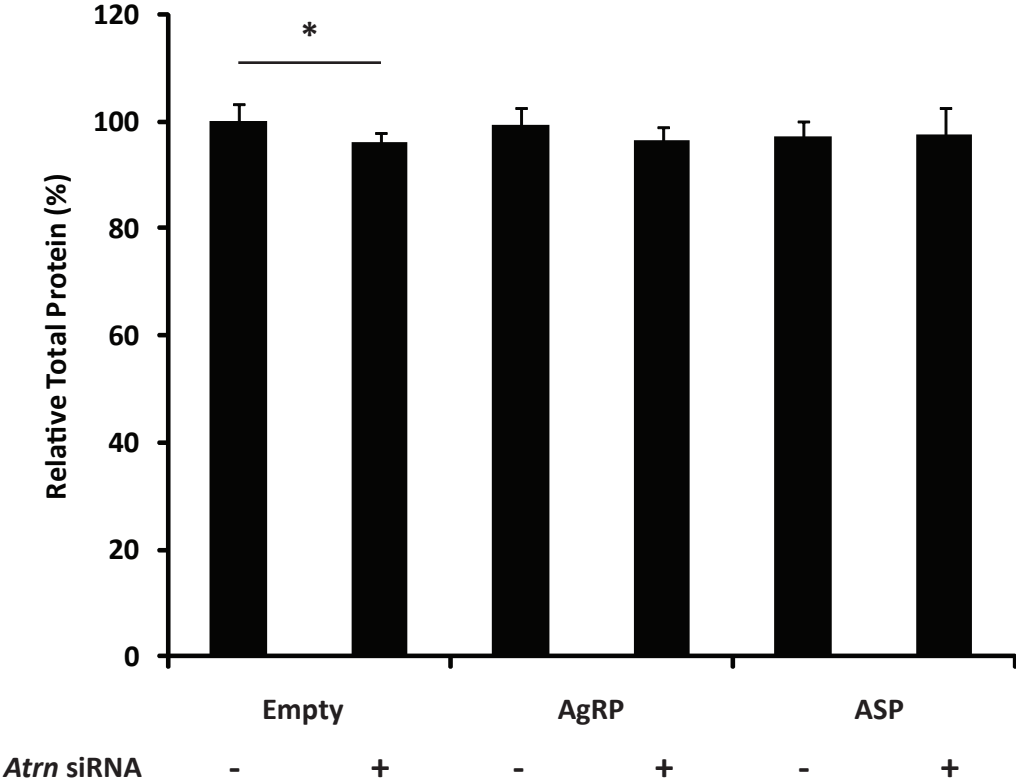

Supplement: supp_M111.224592_jbc.M111.224592-3.pdf [file supp_M111.224592_jbc.M111.224592-3.pdf]

**FIG. S3**

**A.**

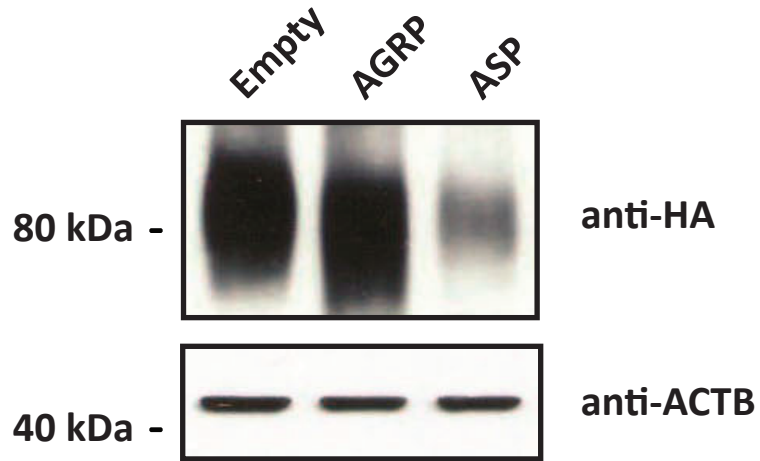

**B.**

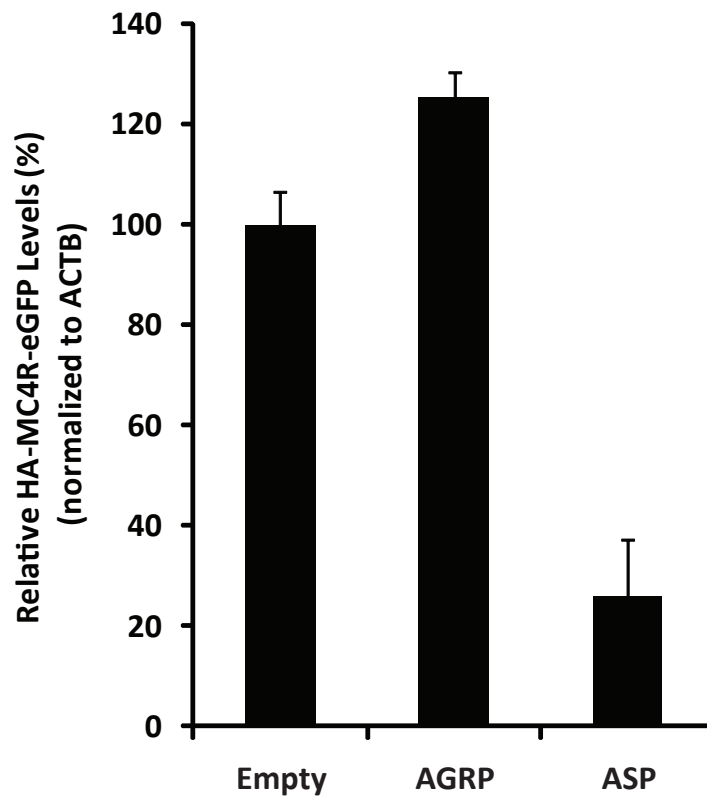

Supplement: supp_M111.224592_jbc.M111.224592-4.pdf [file supp_M111.224592_jbc.M111.224592-4.pdf]
